# Supplementary material for: Strain-Promoted Azide–Alkyne Cycloaddition-Based PSMA-Targeting Ligands for Multimodal Intraoperative Tumor Detection of Prostate Cancer
Source: PubMed Central journal article supplement — Bioconjug Chem. 2021 Dec 25;33(1):194–205. doi: 10.1021/acs.bioconjchem.1c00537 (PMC8778659; doi:10.1021/acs.bioconjchem.1c00537), 2021-12-25
Supplement: bc1c00537_si_001.pdf [file bc1c00537_si_001.pdf]

# Strain-promoted azide-alkyne cycloaddition-based PSMA-targeting ligands for multimodal intraoperative tumor detection of prostate cancer

**Authors:** Yvonne H.W. Derks<sup>1\*</sup>, Mark Rijpkema<sup>1</sup>, Helene I.V. Amaldjais-Groenen<sup>2</sup>, Cato C. Loeff<sup>1</sup>, Kim E. de Roode<sup>2</sup>, Annemarie Kip<sup>1</sup>, Peter Laverman<sup>1</sup>, Susanne Lütje<sup>3</sup>, Sandra Heskamp<sup>1</sup> and Dennis W. P. M. Löwik<sup>2</sup>

<sup>1</sup>Department of Medical Imaging, Nuclear Medicine, Radboud university medical center, Radboud Institute for Molecular Life Sciences, 6525GA Nijmegen, The Netherlands.

<sup>2</sup>Radboud University Nijmegen, Institute for Molecules and Materials, Organic Chemistry, 6525XZ Nijmegen, The Netherlands.

<sup>3</sup>Department of Nuclear Medicine, University Hospital Bonn, 53127 Bonn, Germany.

## **\*Corresponding author:**

Yvonne Derks

Department of Medical Imaging, Nuclear Medicine

Radboud university medical center

Geert Grooteplein Zuid 10

6525GA Nijmegen

Phone: +31 (0)24 365 5340

E-mail: [yvonne.derks@radboudumc.nl](mailto:yvonne.derks@radboudumc.nl)

ORCID: 0000-0002-8512-4103

## Supporting Information

### Supplementary materials and methods

#### *DIPCDI coupling of protected amino acids:*

Fmoc-protected amino acid (3.0 eq.), 1-hydroxybenzotriazole hydrate (HOBT, 1M in DMF, 3.6 eq.), N,N'-Diisopropylcarbodiimide (DIPCDI, 1M in DMF, 3.3 eq.) were added to the resin and agitated until the Kaiser test was negative (~45 minutes) after which the resin was capped with a mixture of Ac<sub>2</sub>O (10 eq) and pyridine (10 eq) in DMF for 5 minutes and subsequently washed with DMF (3x10 mL).

#### *HATU coupling of protected amino acids:*

Fmoc-protected amino acid (3.0 eq.), 1-hydroxybenzotriazole hydrate (HOBT, 3.6 eq.), (1-[Bis(dimethylamino)methylene]-1H-1,2,3-triazolo[4,5-b]pyridinium 3-oxide hexafluorophosphate (HATU, 2.9 eq.) and N,N'-diisopropylethylamine (DIPEA, 6 eq.) were dissolved in DMF. The solution was pre-activated for 2 minutes before it was added to the resin. The mixture was agitated until the Kaiser test was negative (~1.5 hrs.) after which the resin was washed with DMF (3x10 mL) and DCM (3x10 mL).

#### *Fmoc removal:*

The resin was treated with 20% piperidine in DMF 3x6 minutes. The product was washed with DMF (3x10 mL).

#### *Alloc removal:*

Phenylsilane (25eq) and tetrakis(triphenylphosphine)palladium(0) (0.3eq) in DCM were added to the resin. The mixture was agitated for 20-30 minutes under a stream of argon (upon which the color changed from yellow to dark brown). Next the resin was washed with DCM, DMF and sodium diethyldithiocarbamate (0.5% in DMF) until the brown color had completely disappeared (generally 3 times).

*Synthesis of the PSMA binding motif and linker*

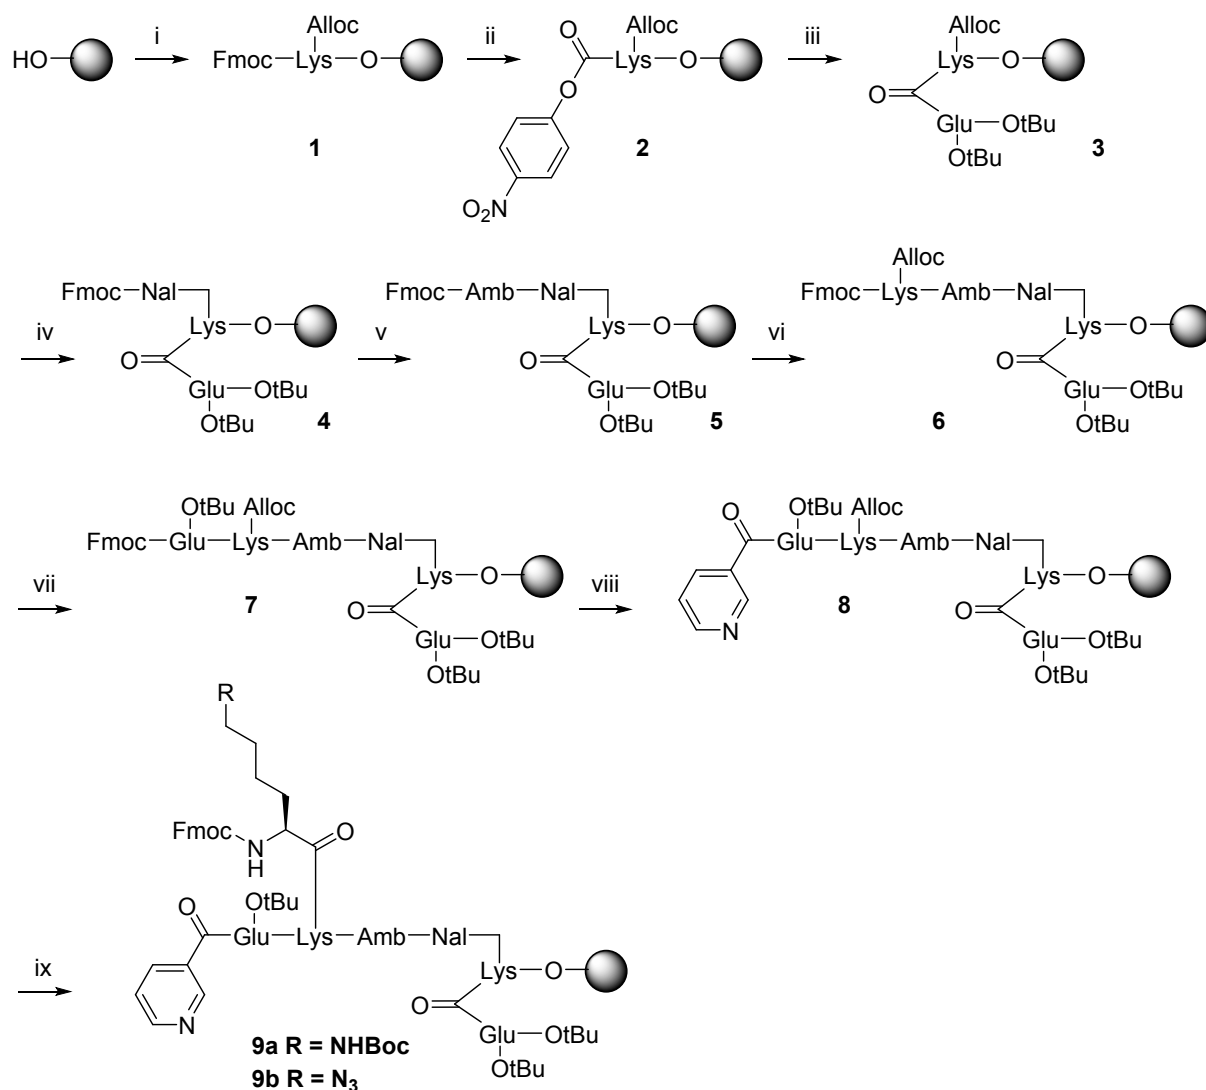

**Fig. S1. Synthesis of the common PSMA binding motif and linker.**

i) Wang resin (1 eq., 1.0 mmol/g, 1.00 g) was swollen in 10 mL DMF for 10 minutes. Fmoc-Lys(Alloc)-OH (3 eq., 3 mmol, 1.87 g), 4-dimethylaminopyridine (1 eq., 1 mmol, 122.2 mg), HOBt (3.6 eq., 3.6 mmol, 1M in DMF) and DIPCDI (3.3 eq., 3.3 mmol, 1M in DMF) were added to the resin and mixed on a bench roller for 20 hours. The reagents were removed from the resin by vacuum filtration. The resin was washed with DMF (3x10 mL) and DCM (3x10 mL). The Fmoc-loading was determined to be 0.5 mmol/g. Next, the resin was capped with a solution of pyridine (0.34 mL/g resin) and benzoyl chloride (0.34 mL/g resin) in DCM for 1 hour.

- ii) The resin was washed with DCM (3x10 mL) and DMF (3x10 mL) and after Fmoc removal DIPEA (0.52 mL, 3 eq., 3 mmol,), 4-nitrophenyl chloroformate (2 eq., 2.0 mmol, 402 mg) in 2 mL DCM were added to the H-Lys(Mtt)-resin (1eq, 0.5 mmol/g, 2 g) and the resin was agitated for 1 hour. Consecutively a Kaiser test was performed to check for completion (39).
- iii) Glutamic acid di-*tert*-butyl ester hydrochloride (3 eq., 3 mmol, 887.4 mg) and DIPEA (4 eq., 4 mmol, 0.70 mL) in DCM were added to the resin and the mixture was agitated for 1 hour. The resin was washed with DCM (3x10 mL) and DMF (3x10 mL).
- iv) After Alloc removal, Fmoc-3-(2-naphthyl)-L-alanine (Fmoc-Nal) was coupled using HATU.
- v) After Fmoc removal either Fmoc-(4-aminomethyl)benzoic acid (Fmoc-Amb) or trans-4-(aminomethyl)cyclohexane-1-carboxylic acid (Fmoc-Amc) was coupled using DIPCDI.
- vi) After Fmoc removal Fmoc-Lys(Alloc)-OH was coupled using DIPCDI.
- vii) After Fmoc removal Fmoc-Glu(OtBu)-OH was coupled using DIPCDI.
- viii) After Fmoc removal nicotinic acid was coupled using DIPCDI
- ix) After Alloc removal, Fmoc-Lys(Alloc) was coupled using DIPCDI.
- x) DIPEA (2 eq.) and DOTA-OSu were added to the resin in NMP and mixed on a bench roller at room temperature respectively for 6-8 hrs. Upon a negative Kaiser test the resin was washed with DMF (3x), DCM (3x), MeOH (3x) and diethyl ether (3x).
- xi) The peptide was cleaved from the resin with trifluoroacetic acid/H<sub>2</sub>O (95:5, v/v) for two hours after which the resin was filtered off and the peptide was precipitated in diethyl ether. After drying in air the crude peptide was lyophilized from water.
- xii) After Fmoc removal, Fmoc-Gly-OH was coupled. This was repeated twice to couple two more glycines.
- xiii) After Fmoc removal N-succinimidyl S-acetylthioacetate (SATA, 3eq.) in DMF was added to the resin. Upon a negative Kaiser test (~45 minutes) the resin was washed with DMF (3x), DCM (3x), MeOH (3x) and diethyl ether (3x)

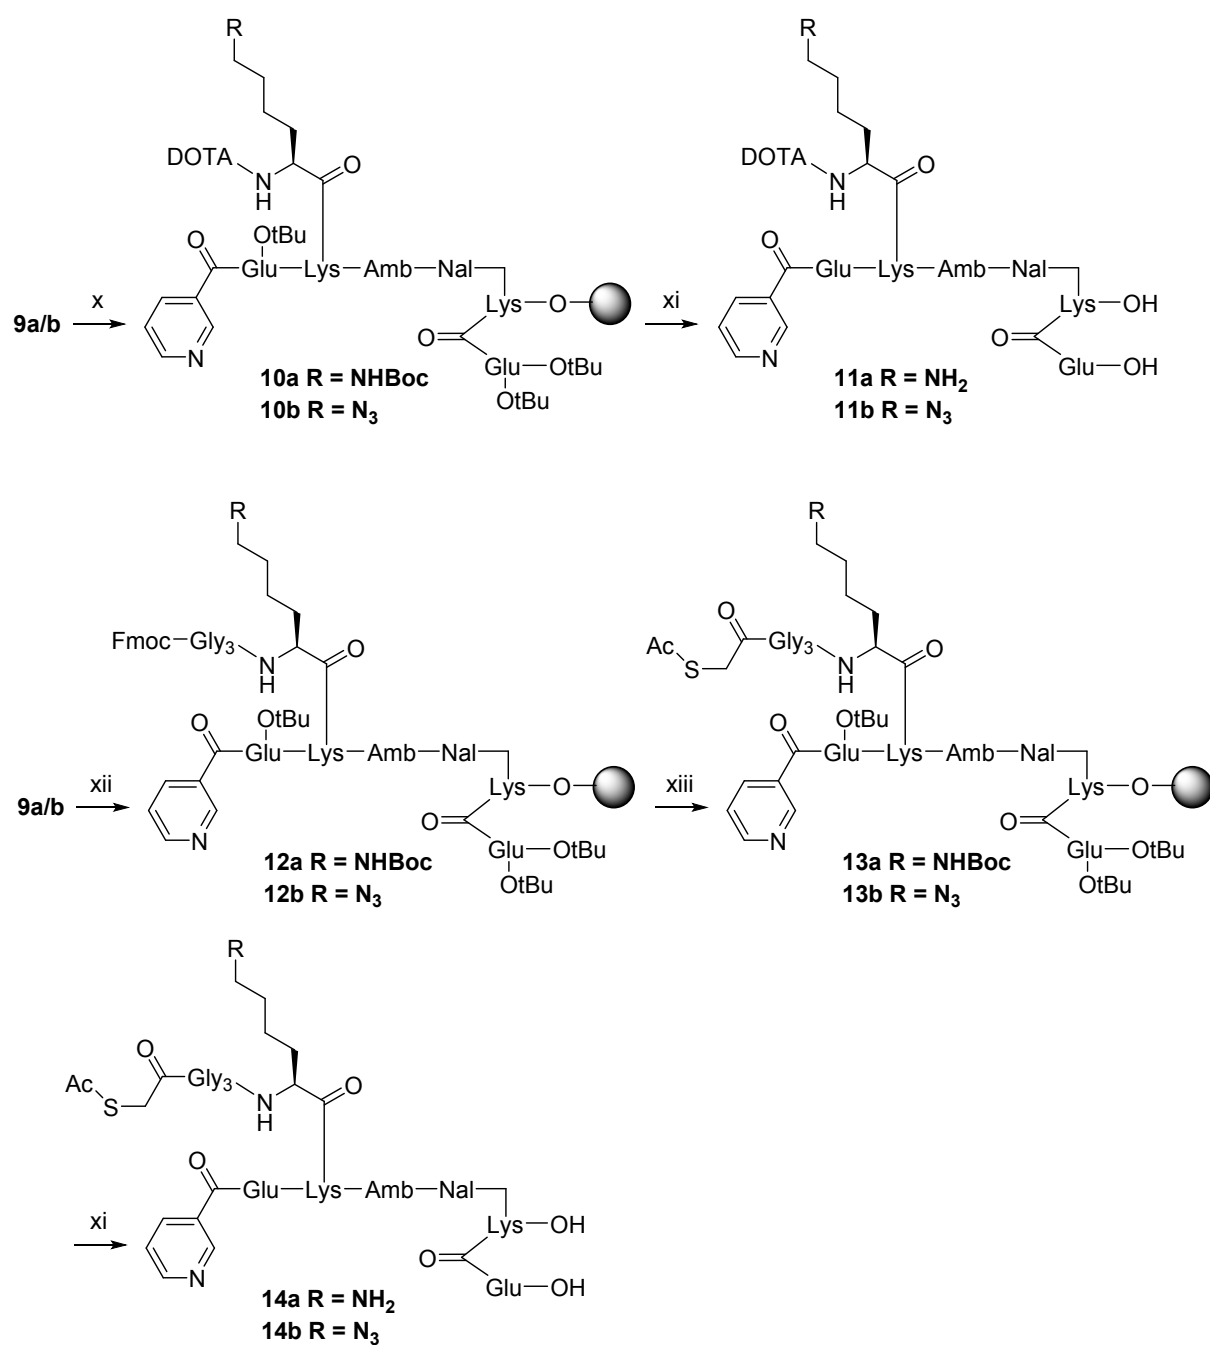

**Fig. S2. Synthesis of peptide ligands without dye.**

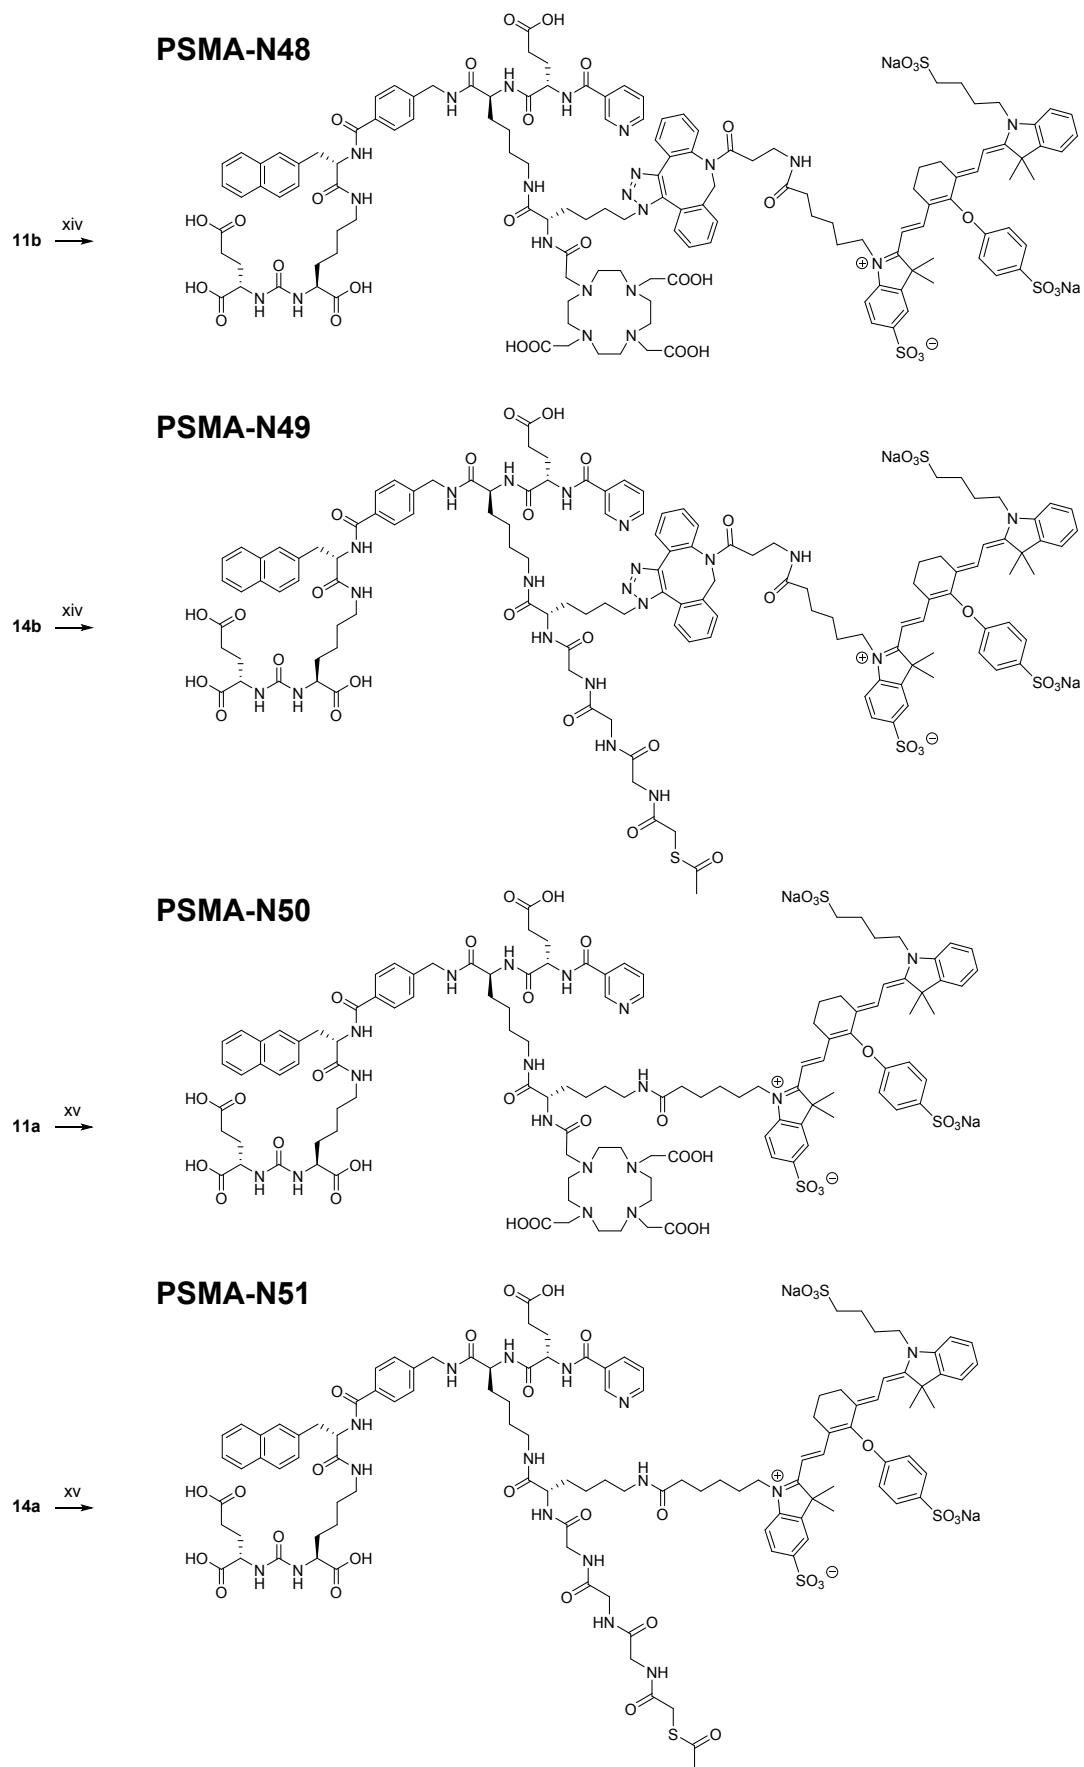

Fig. S3. Conjugation of IRDye800CW to the ligands.

*Conjugation with IRDye800CW:*

Peptide was dissolved in phosphate buffer (0.25 M, pH 8) after which the dye OSu ester (0.5-0.6 eq. in dry DMF) was added and shaken at rt for 4-6 hrs. The product was purified directly by preparative HPLC.

*Analytical HPLC:*

Compounds were analyzed on a Shimadzu LC-20A Prominence system with a dual UV-Vis detector (Shimadzu, 's Hertogenbosch, The Netherlands) equipped with a C18 Gemini-NX column, 150 × 3 mm, particle size 3 μm (Phenomenex, Utrecht, The Netherlands) Solvent A was 0.1% trifluoroacetic acid (TFA) in H<sub>2</sub>O and solvent B was 0.1% TFA in acetonitrile (MeCN). A gradient of 5-100% acetonitrile (30 min.) was applied.

*Preparative HPLC:*

All compounds were purified on a Shimadzu dual-pump LC-20A Prominence system (Shimadzu, 's Hertogenbosch, The Netherlands) equipped with a C18 Gemini-NX column, 150 × 10 mm, particle size 10 μm (Phenomenex, Utrecht, The Netherlands), applying a gradient of 20-80% methanol in triethylammonium acetate buffer (10 mM, pH 7) for all IRDye containing compounds or a gradient of 5-100% acetonitrile in water (0.1% TFA) for all others.

## Supplementary results

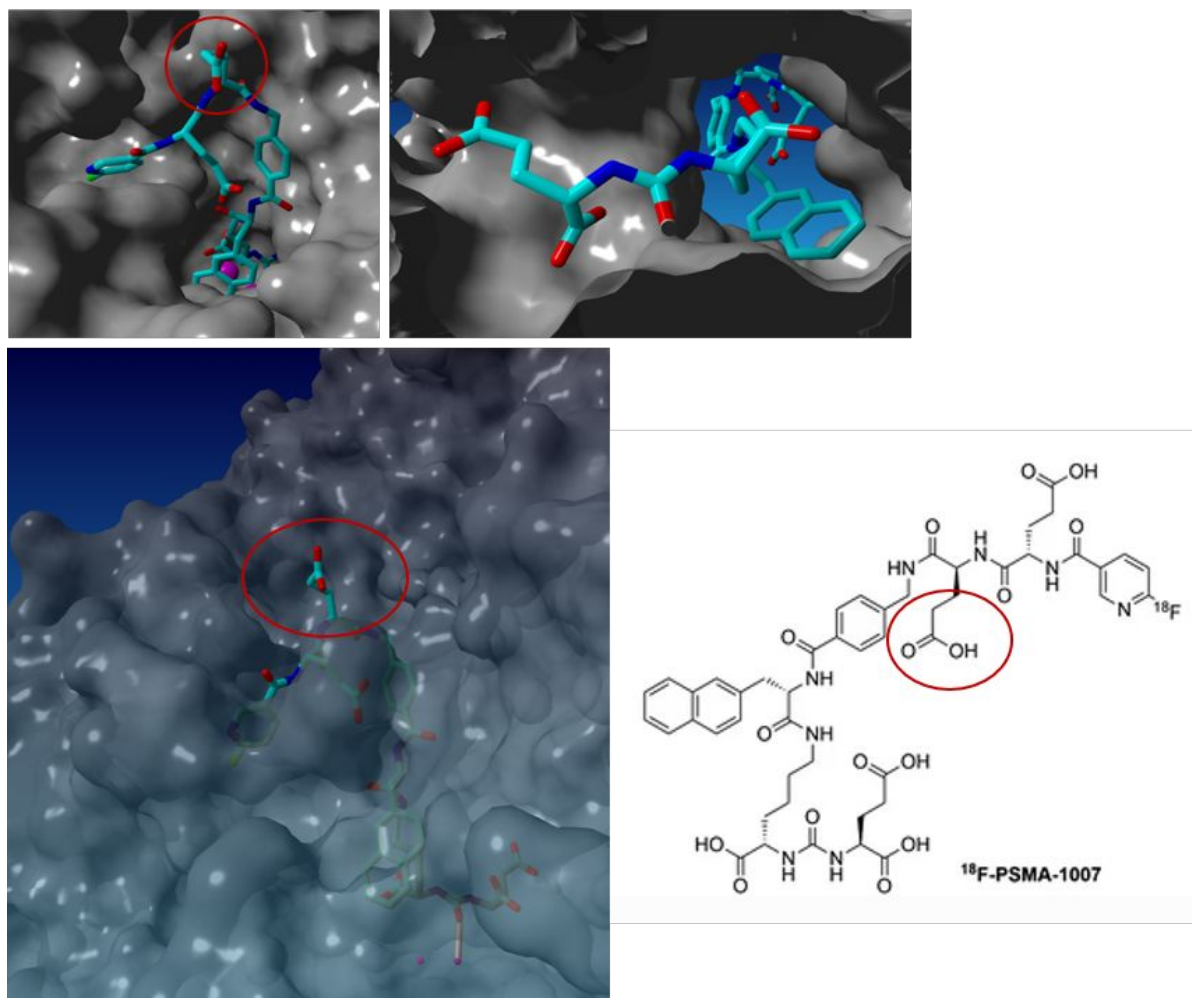



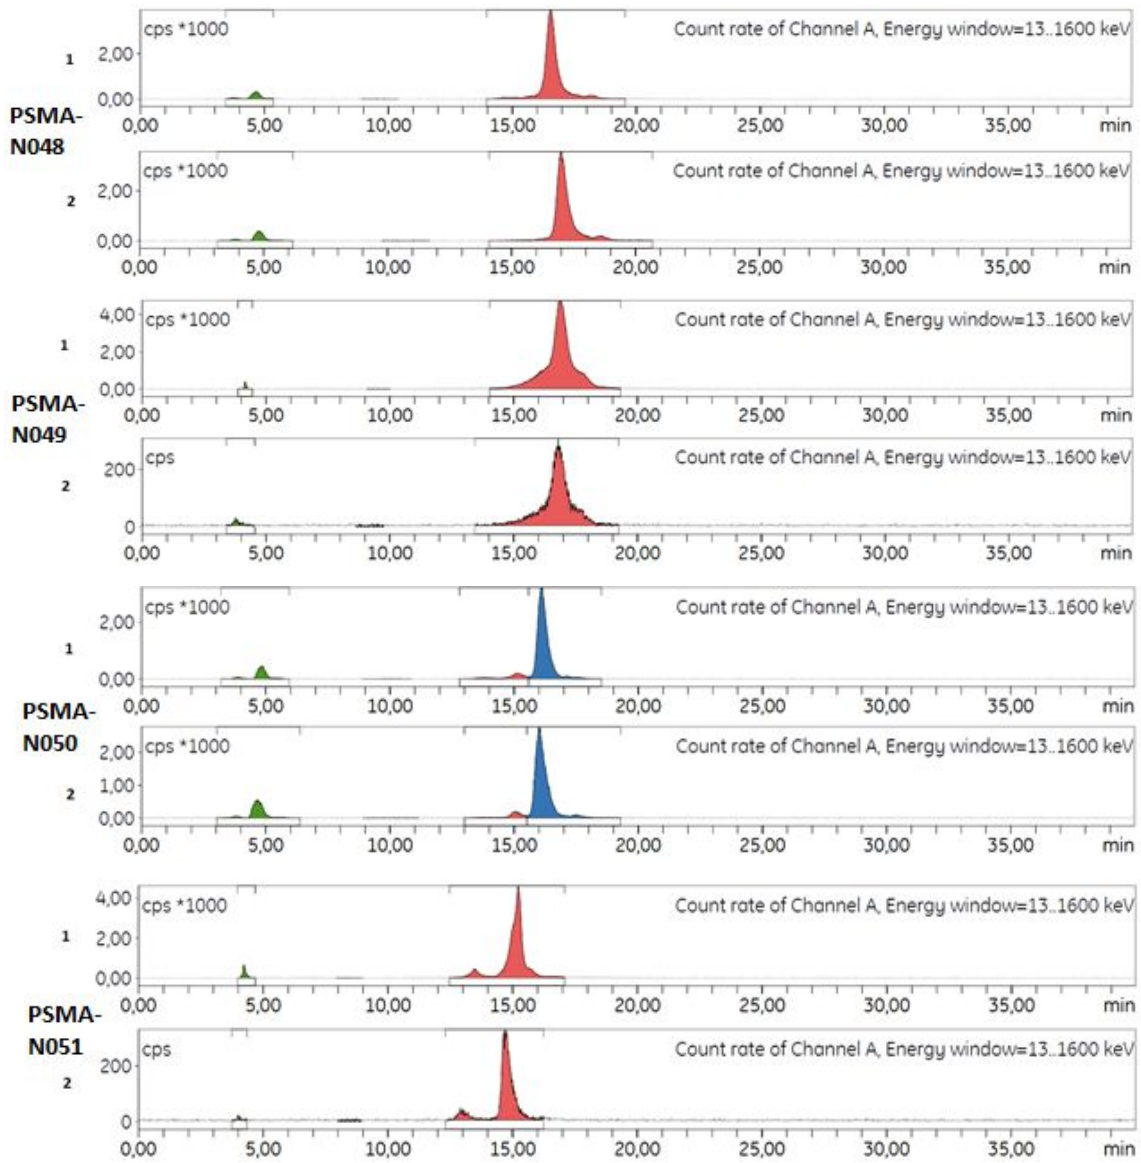

**Fig. S5. Serum stability determination in human serum.** Serum stability of four dual-labeled ligands was tested with use of RP-HPLC. Stability determination before (1) and after 2 hours of incubation in human serum (2).

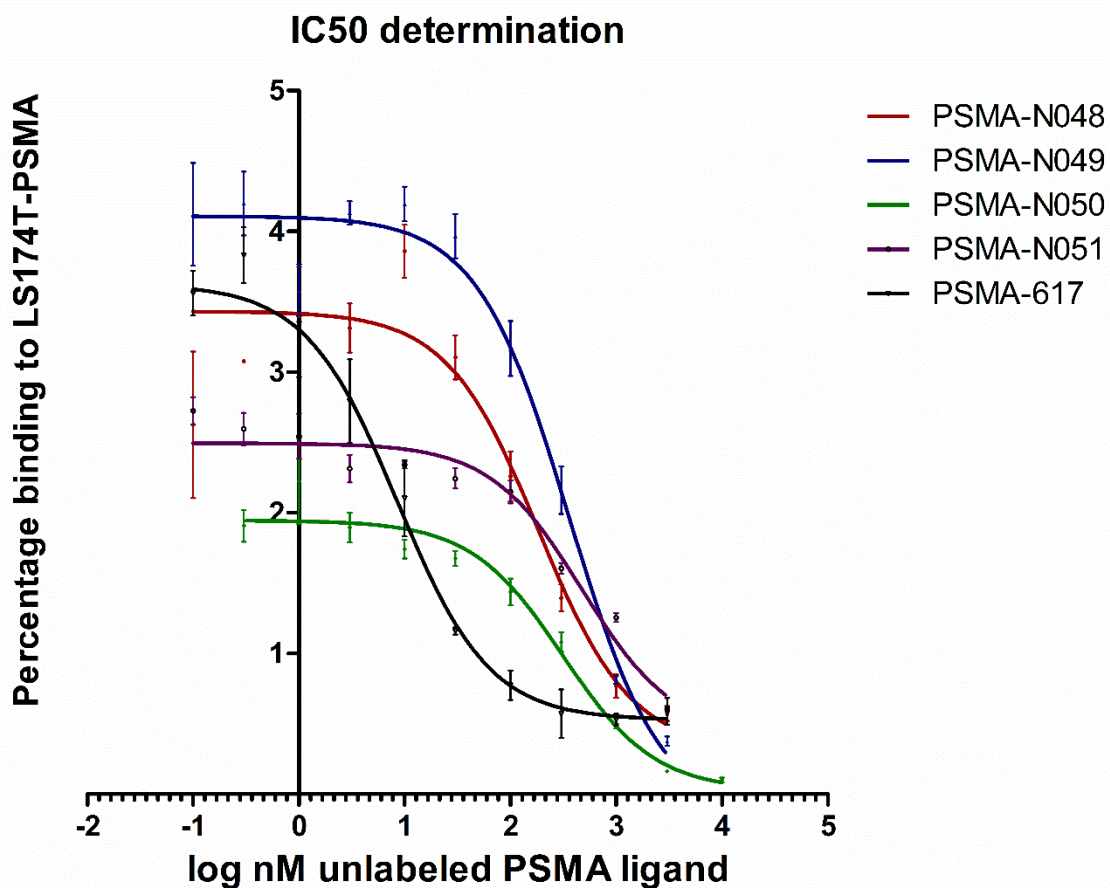

**Fig. S6. IC<sub>50</sub> determination of PSMA-N048, PSMA-N049, PSMA-N050, PSMA-N051 and PSMA-617 in PSMA-positive LS174T cells.** IC<sub>50</sub> graphs of PSMA-N048 (red), PSMA-N049 (blue), PSMA-N050 (green) and PSMA-N051 (purple). IC<sub>50</sub> is defined as the concentration required to inhibit the binding of clinically available <sup>111</sup>In-PSMA-617 by 50%. Data is expressed as percentage binding of PSMA-617 (y-axis) and the log scale of unlabeled ligand (cold, x-axis). PSMA-617 was used as a positive control (black).

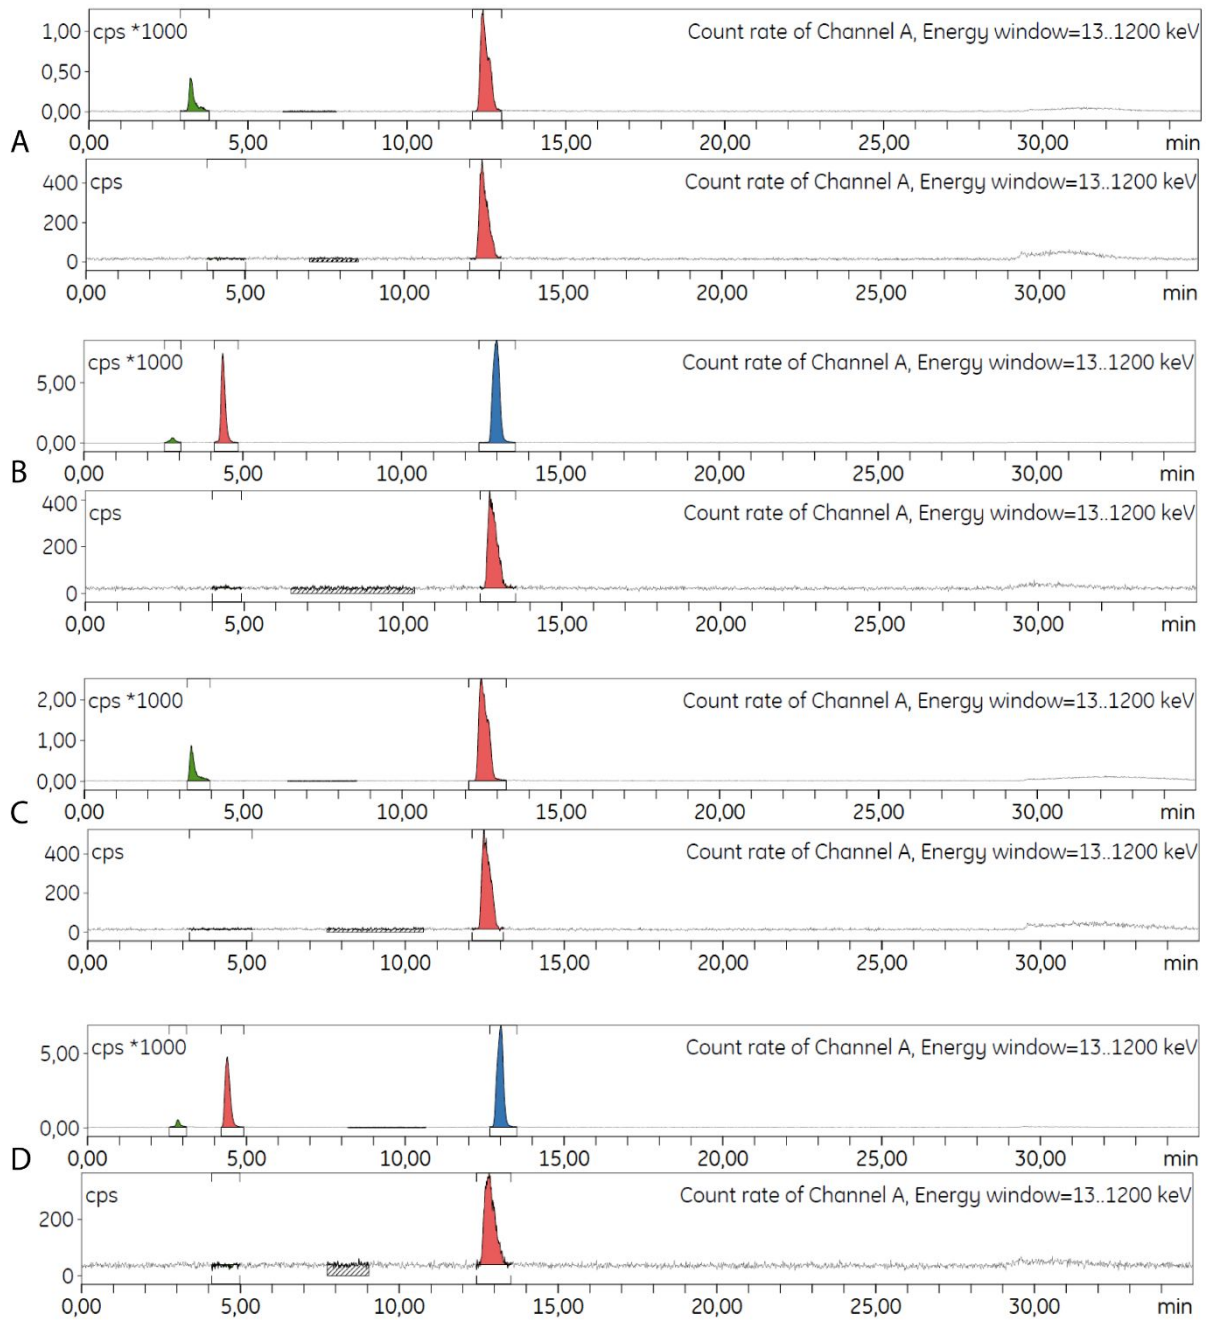

**Fig. S7. Radio-HPLC before and after C18 purification.** Radio-HPLC of (A) N48, (B) N49, (C) N50 and (D) N51 before and after Seppak C18 purification. Ligands were labeled with  $^{111}\text{In}$  or  $^{99\text{m}}\text{Tc}$  and purified before intravenous injection in mice.

**Table S1. Pharmacokinetics of <sup>99m</sup>Tc-labeled PSMA-N049 and <sup>111</sup>In-labeled PSMA-N048 in mice bearing LS174T-PSMA and LS174T xenografts**

|                        | <i>PSMA-N049</i><br>2h | <i>PSMA-N049</i><br>4h | <i>PSMA-N049</i><br>24h | <i>PSMA-N048</i><br>2h | <i>PSMA-N048</i><br>4h | <i>PSMA-N048</i><br>24h |
|------------------------|------------------------|------------------------|-------------------------|------------------------|------------------------|-------------------------|
| <b>Biodistribution</b> |                        |                        |                         |                        |                        |                         |
| Blood                  | 2.8 ± 0.5              | 1.6 ± 0.2              | 0.3 ± 0.1               | 1.8 ± 0.2              | 0.8 ± 0.1              | 0.1 ± 0.0               |
| Muscle                 | 0.6 ± 0.2              | 0.4 ± 0.1              | 0.1 ± 0.0               | 0.8 ± 0.1              | 0.3 ± 0.1              | 0.3 ± 0.0               |
| Tumor- LS174T          | 1.7 ± 0.4              | 1.3 ± 0.2              | 0.6 ± 0.2               | 1.9 ± 0.4              | 1.4 ± 0.3              | 1.0 ± 0.4               |
| Tumor+ LS174T-PSMA     | 9.0 ± 1.0              | 10.5 ± 1.7             | 8.9 ± 0.7               | 23.0 ± 4.2             | 22.8 ± 1.6             | 17.8 ± 1.6              |
| Heart                  | 1.2 ± 0.1              | 0.9 ± 0.1              | 0.2 ± 0.0               | 1.2 ± 0.3              | 0.8 ± 0.1              | 0.4 ± 0.1               |
| Lung                   | 2.8 ± 0.5              | 1.8 ± 0.2              | 0.5 ± 0.0               | 5.5 ± 1.6              | 2.4 ± 0.8              | 0.9 ± 0.4               |
| Spleen                 | 3.9 ± 0.4              | 3.3 ± 0.7              | 1.6 ± 0.4               | 3.8 ± 0.6              | 2.9 ± 0.5              | 2.0 ± 0.5               |
| Pancreas               | 0.8 ± 0.4              | 0.6 ± 0.1              | 0.2 ± 0.0               | 0.8 ± 0.1              | 0.6 ± 0.1              | 0.3 ± 0.0               |
| Liver                  | 5.1 ± 0.5              | 4.4 ± 0.6              | 2.6 ± 1.3               | 2.8 ± 0.3              | 2.5 ± 0.2              | 2.2 ± 0.2               |
| Stomach                | 1.5 ± 0.2              | 1.1 ± 0.1              | 0.4 ± 0.0               | 1.3 ± 0.2              | 0.8 ± 0.1              | 0.5 ± 0.0               |
| Kidney                 | 43.4 ± 2.3             | 60.5 ± 13.5            | 43.1 ± 7.2              | 103.4 ± 7.1            | 103.1 ± 5.6            | 70.0 ± 5.9              |
| Adrenals               | 3.3 ± 0.6              | 2.9 ± 1.1              | 0.9 ± 0.3               | 3.7 ± 1.4              | 3.1 ± 0.3              | 1.9 ± 0.4               |
| Duodenum               | 1.5 ± 0.3              | 1.0 ± 0.2              | 0.4 ± 0.0               | 1.1 ± 0.1              | 0.7 ± 0.1              | 0.4 ± 0.1               |
| Prostate               | 1.1 ± 0.3              | 0.8 ± 0.8              | 0.4 ± 0.1               | 1.5 ± 0.4              | 0.9 ± 0.5              | 0.8 ± 0.2               |
| Salivary glands        | 1.8 ± 0.1              | 1.4 ± 0.4              | 0.5 ± 0.1               | 1.9 ± 0.2              | 1.2 ± 0.1              | 1.1 ± 0.1               |
| Bone marrow            | 1.8 ± 0.1              | 1.5 ± 0.3              | 1.1 ± 0.2               | 1.2 ± 0.4              | 1.0 ± 0.2              | 1.6 ± 0.4               |
| Bone                   | 1.0 ± 0.2              | 0.7 ± 0.1              | 0.4 ± 0.0               | 1.3 ± 0.3              | 0.8 ± 0.1              | 0.6 ± 0.0               |
|                        |                        |                        |                         |                        |                        |                         |
| Tumor/Blood            | 3.1 ± 0.4              | 6.1 ± 1.1              | 33.0 ± 8.7              | 12.8 ± 1.9             | 12.8 ± 1.9             | 262.4 ± 28.7            |
| Tumor/Kidney           | 0.2 ± 0.0              | 0.2 ± 0.0              | 0.2 ± 0.0               | 0.2 ± 0.0              | 0.2 ± 0.0              | 0.3 ± 0.0               |
| Tumor/ Tumor-          | 5.5 ± 1.2              | 7.4 ± 2.5              | 16.3 ± 4.7              | 14.3 ± 2.5             | 14.3 ± 2.5             | 20.7 ± 4.5              |
| Tumor/Spleen           | 2.4 ± 0.4              | 3.3 ± 0.8              | 6.2 ± 2.2               | 6.2 ± 1.8              | 6.2 ± 1.8              | 9.8 ± 3.2               |
| Tumor/Liver            | 1.7 ± 0.1              | 2.3 ± 0.5              | 3.8 ± 1.3               | 8.2 ± 1.0              | 8.2 ± 1.0              | 7.8 ± 1.3               |
| Tumor/Salivary gland   | 4.6 ± 1.1              | 7.4 ± 1.9              | 17.8 ± 2.3              | 12.2 ± 2.2             | 12.2 ± 2.2             | 15.6 ± 2.0              |
| Tumor/Prostate         | 9.2 ± 2.4              | 13.7 ± 4.2             | 24.7 ± 6.1              | 16.8 ± 4.2             | 16.8 ± 4.2             | 22.8 ± 5.6              |

**Table S2. Biodistribution of <sup>111</sup>In- or <sup>99m</sup>Tc labeled multimodal ligands in mice bearing LS174T-PSMA and LS174T xenografts 2 h p.i.**

|                           | <i>PSMA-N049</i> | <i>PSMA-N051</i> | <i>PSMA-N048</i> | <i>PSMA-N050</i> | <i>PSMA-617</i> |
|---------------------------|------------------|------------------|------------------|------------------|-----------------|
| <b>Biodistribution</b>    |                  |                  |                  |                  |                 |
| Blood                     | 3.5 ± 1.6        | 2.1 ± 0.5        | 1.9 ± 0.2        | 1.1 ± 0.1        | 0.1 ± 0.02      |
| Muscle                    | 0.8 ± 0.1        | 0.7 ± 0.2        | 0.8 ± 0.2        | 0.4 ± 0.1        | 0.1 ± 0.1       |
| Tumor- LS174T             | 1.9 ± 0.6        | 1.6 ± 1.4        | 2.1 ± 0.5        | 1.1 ± 0.3        | 0.2 ± 0.2       |
| Tumor+ LS174T-PSMA        | 12.0 ± 1.4       | 17.7 ± 3.7       | 21.2 ± 1.2       | 25.3 ± 2.0       | 18.5 ± 1.9      |
| Heart                     | 1.6 ± 0.2        | 1.0 ± 0.2        | 1.0 ± 0.1        | 0.6 ± 0.1        | 0.03 ± 0.01     |
| Lung                      | 4.0 ± 0.4        | 1.9 ± 0.8        | 2.8 ± 0.4        | 1.6 ± 0.3        | 0.1 ± 0.1       |
| Spleen                    | 5.4 ± 0.6        | 5.8 ± 1.2        | 5.7 ± 0.8        | 5.5 ± 1.7        | 0.5 ± 0.2       |
| Pancreas                  | 1.0 ± 0.1        | 1.0 ± 0.6        | 0.8 ± 0.1        | 0.7 ± 0.2        | 0.1 ± 0.1       |
| Liver                     | 4.3 ± 0.3        | 1.7 ± 0.3        | 3.3 ± 0.3        | 1.2 ± 0.1        | 0.1 ± 0.02      |
| Stomach                   | 1.8 ± 0.2        | 1.0 ± 0.3        | 1.5 ± 0.2        | 0.8 ± 0.1        | 0.1 ± 0.1       |
| Kidney                    | 73.9 ± 5.6       | 81.6 ± 13.5      | 121.6 ± 8.2      | 129.9 ± 15.3     | 7.1 ± 2.6       |
| Adrenals                  | 5.8 ± 1.6        | 6.9 ± 2.7        | 8.7 ± 0.5        | 8.8 ± 2.4        | 1.4 ± 0.6       |
| Duodenum                  | 1.9 ± 0.2        | 1.1 ± 0.2        | 1.3 ± 0.3        | 0.8 ± 0.2        | 0.1 ± 0.1       |
| Prostate                  | 1.5 ± 0.3        | 1.3 ± 0.5        | 1.5 ± 0.6        | 1.4 ± 0.7        | 1.5 ± 3.1       |
| Salivary glands           | 1.9 ± 0.1        | 1.4 ± 0.3        | 2.0 ± 0.2        | 1.0 ± 0.1        | 0.1 ± 0.02      |
| Bone marrow               | 3.0 ± 1.7        | 2.2 ± 0.9        | 2.9 ± 1.0        | 1.4 ± 0.4        | 0.9 ± 1.3       |
| Bone                      | 1.3 ± 0.2        | 0.6 ± 0.1        | 1.6 ± 0.2        | 0.6 ± 0.1        | 0.3 ± 0.5       |
| <b>Tumor/Organ ratios</b> |                  |                  |                  |                  |                 |
| Tumor/Blood               | 6.0 ± 7.0        | 8.4 ± 0.9        | 11.3 ± 0.8       | 22.8 ± 2.6       | 424.4 ± 173.9   |
| Tumor/Kidney              | 0.16 ± 0.01      | 0.22 ± 0.04      | 0.18 ± 0.01      | 0.20 ± 0.02      | 3.0 ± 1.5       |
| Tumor/Negative tumor      | 6.8 ± 2.1        | 15.2 ± 6.2       | 10.4 ± 2.4       | 24.3 ± 6.6       | 141.5 ± 52.8    |
| Tumor/Spleen              | 2.2 ± 0.3        | 3.0 ± 0.1        | 3.8 ± 0.6        | 4.9 ± 1.3        | 43.5 ± 25.0     |
| Tumor/Liver               | 2.8 ± 0.3        | 10.3 ± 1.4       | 6.4 ± 0.3        | 21.1 ± 1.6       | 266.6 ± 73.5    |
| Tumor/Salivary gland      | 6.2 ± 0.6        | 12.9 ± 1.7       | 10.8 ± 1.1       | 24.6 ± 1.6       | 232.9 ± 68.5    |
| Tumor/Prostate            | 8.3 ± 1.4        | 13.9 ± 2.5       | 16.7 ± 7.3       | 22.3 ± 10.2      | 140.0 ± 95.5    |

Fig. S8. HPLC and MALDI-ToF spectra of PSMA-N048, PSMA-N049, PSMA-N050 and PSMA-N051.

**PSMA-N048**

HPLC chromatogram

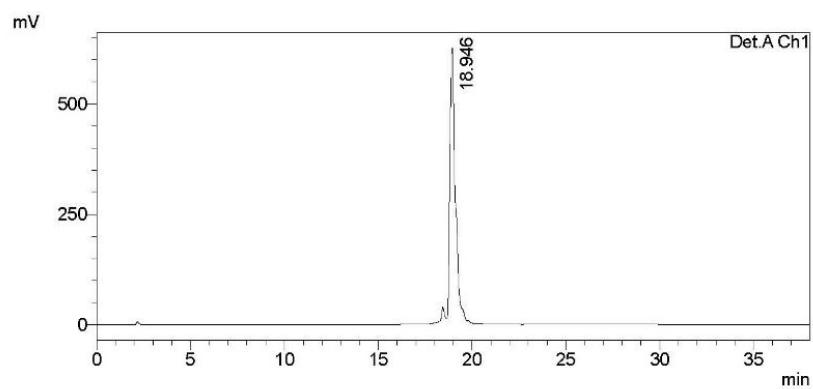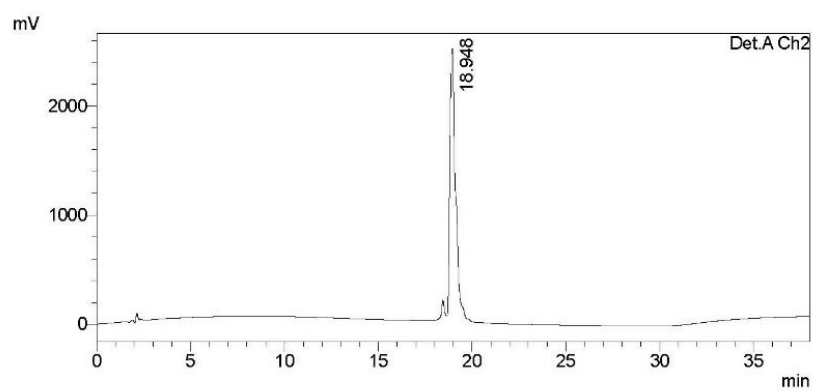

1 Det.A Ch1/260nm  
2 Det.A Ch2/215nm

MALDI-ToF spectrum with matrix SA (Sinapinic acid)

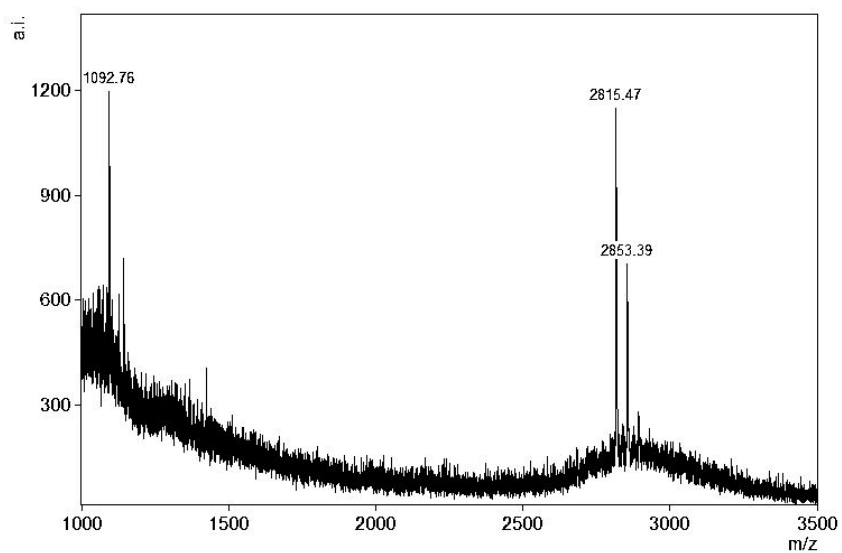

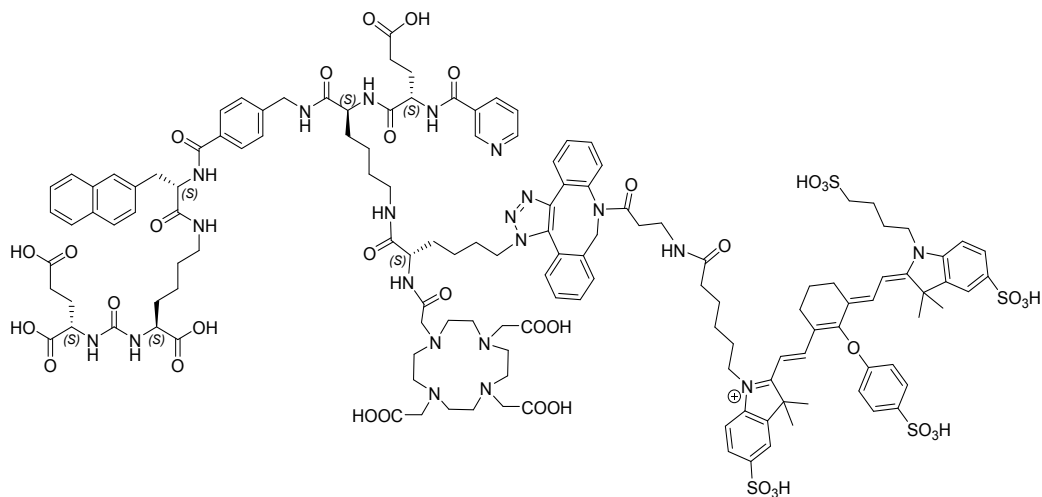

Chemical Formula: C<sub>136</sub>H<sub>166</sub>N<sub>21</sub>O<sub>37</sub>S<sub>4</sub><sup>+</sup>  
 m/z: 2814.07 (100.0%), 2815.07 (73.0%), 2813.06 (68.0%), 2816.07 (24.5%)

### PSMA-N049

HPLC chromatogram

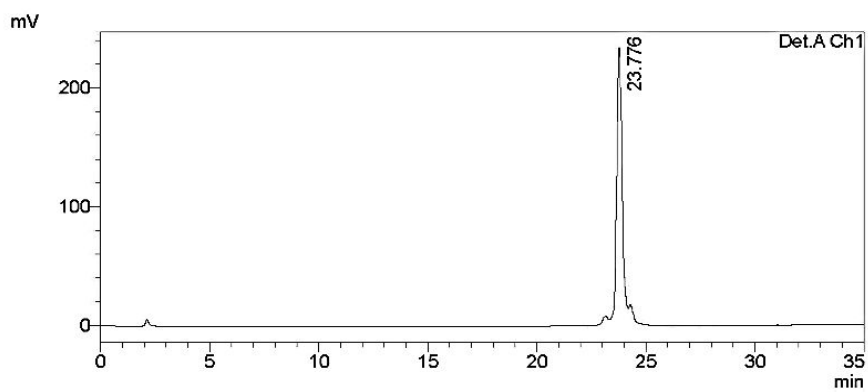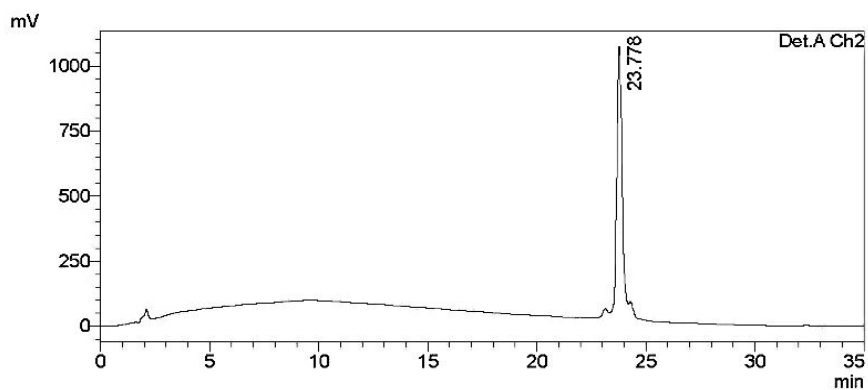

1 Det.A Ch1/260nm  
 2 Det.A Ch2/215nm

# MALDI-ToF spectrum with matrix SA (Sinapinic acid)

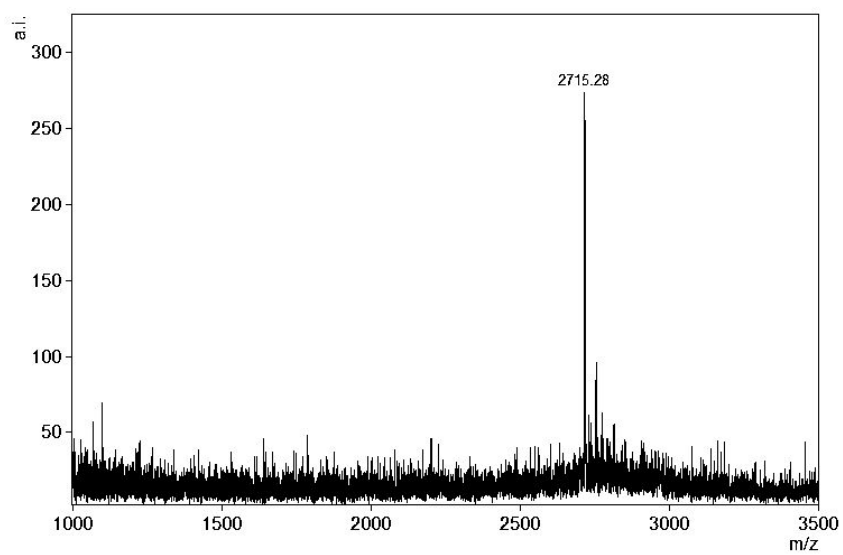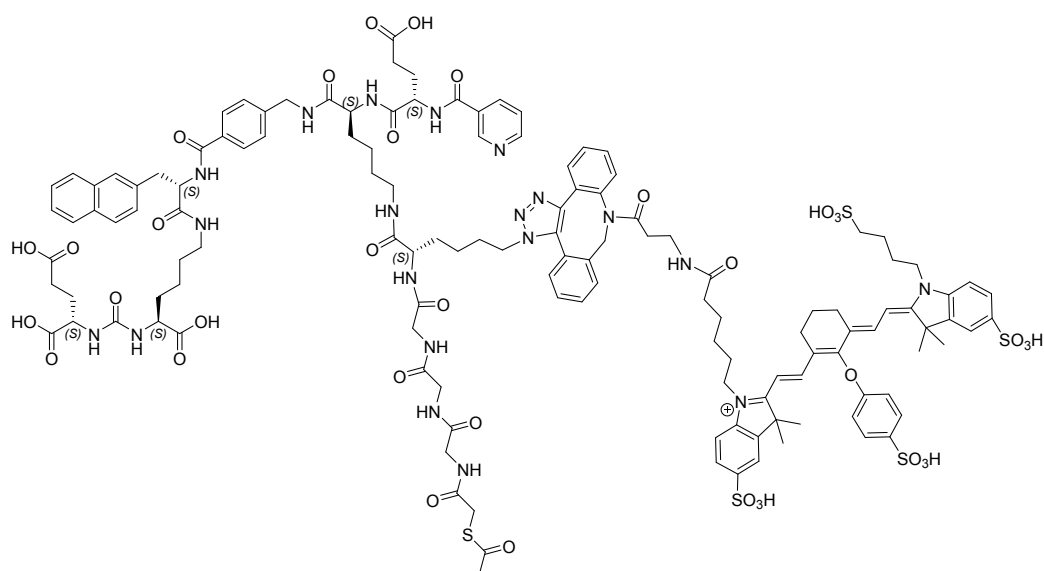

Chemical Formula: C<sub>130</sub>H<sub>153</sub>N<sub>20</sub>O<sub>35</sub>S<sub>5</sub><sup>+</sup>  
m/z: 2714.94 (100.0%), 2713.94 (71.1%), 2715.95 (39.4%), 2715.95 (30.4%), 2716.95 (23.7%), 2716.94 (22.6%)



**PSMA-N050**

HPLC chromatogram

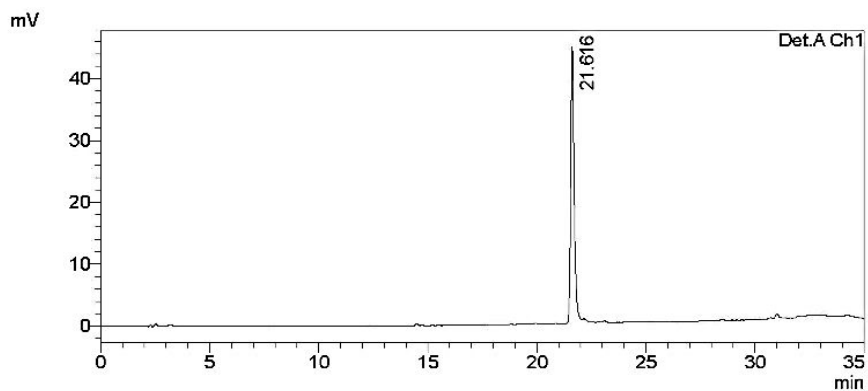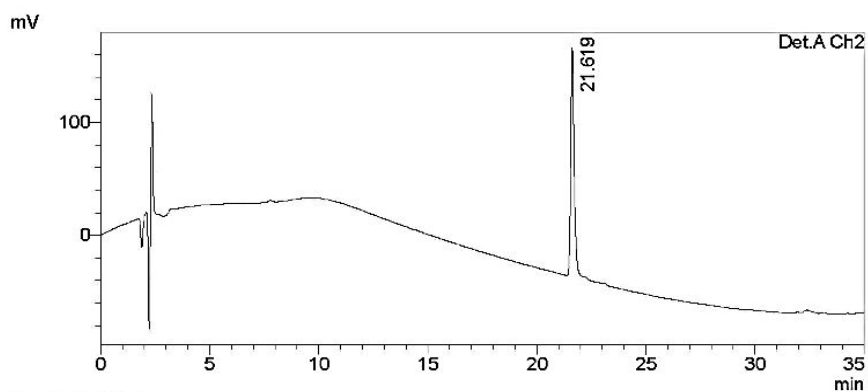

1 Det.A Ch1/260nm  
2 Det.A Ch2/215nm

MALDI-ToF spectrum with matrix SA (Sinapinic acid)

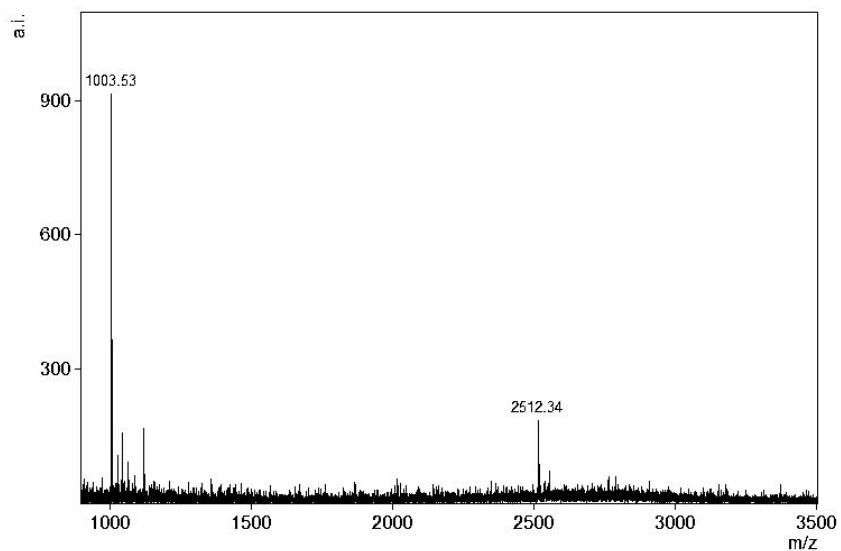

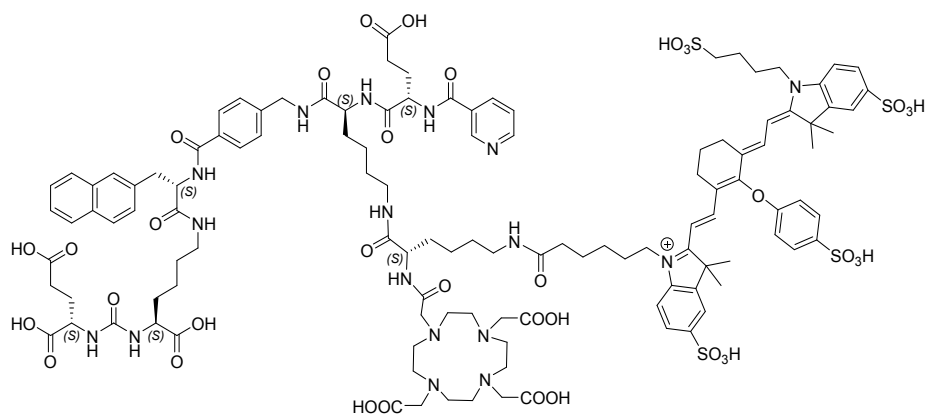

Chemical Formula:  $C_{118}H_{152}N_{17}O_{36}S_4^+$   
 m/z: 2511.95 (100.0%), 2510.95 (78.4%), 2512.95 (63.3%), 2513.95 (18.1%)

### PSMA-N051

HPLC chromatogram

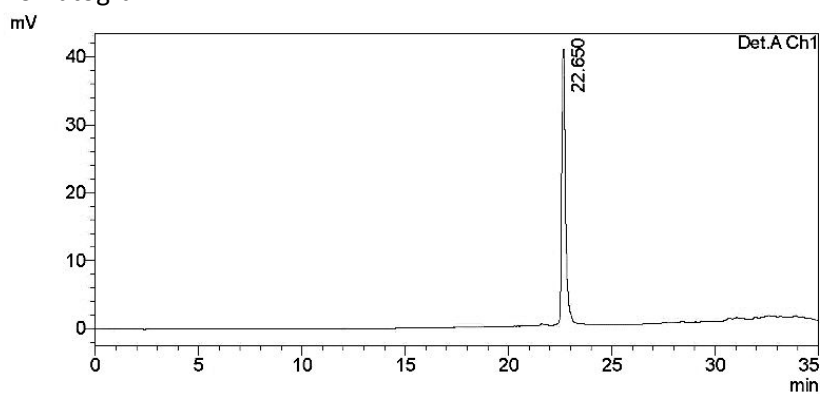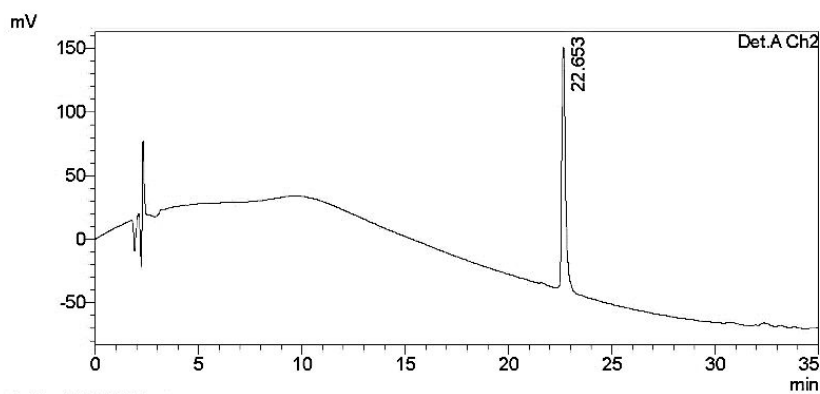

1 Det.A Ch1/260nm  
 2 Det.A Ch2/215nm

MALDI-ToF spectrum with matrix SA (Sinapinic acid)

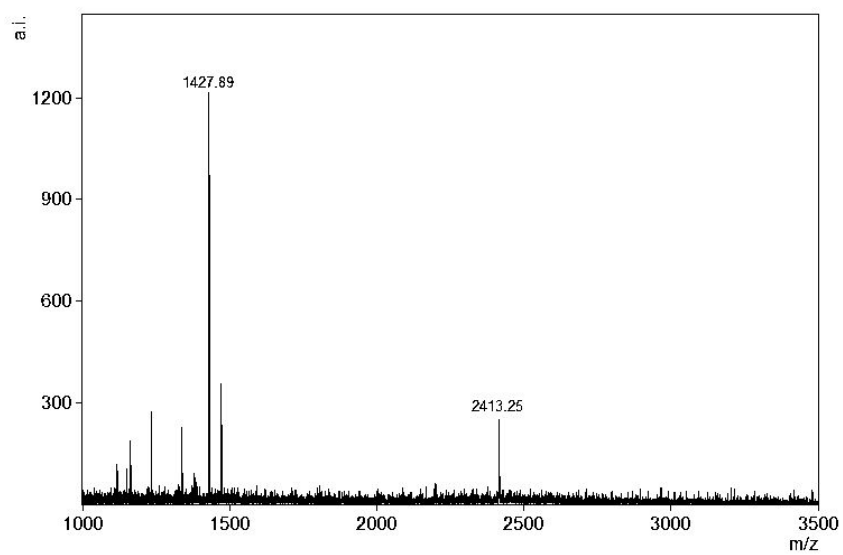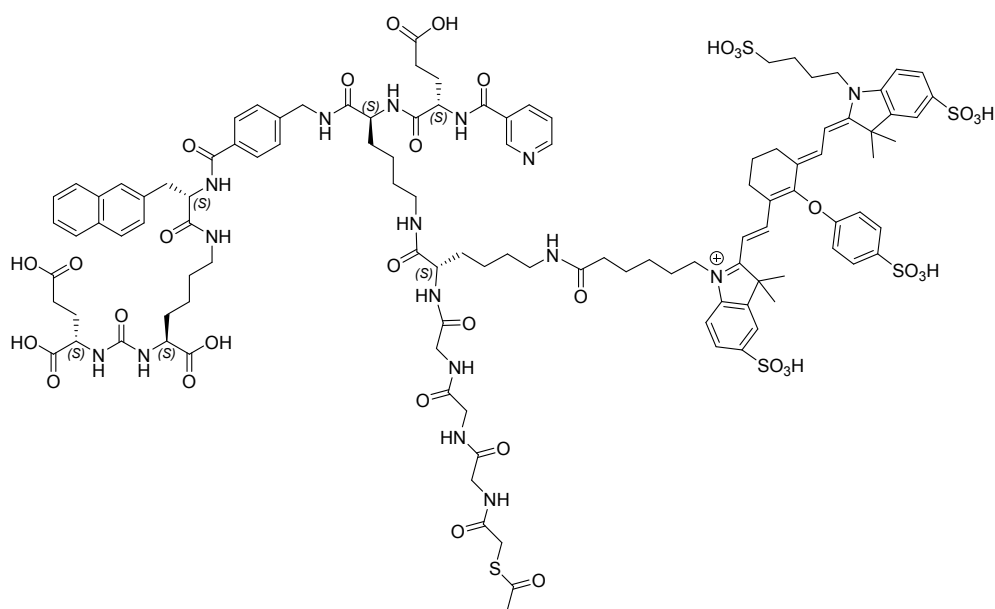

Chemical Formula:  $C_{112}H_{139}N_{16}O_{34}S_5^+$   
m/z: 2412.83 (100.0%), 2411.82 (82.6%), 2413.83 (35.3%), 2413.83 (24.7%), 2414.82 (22.6%)
